# Supplementary figures and images for: Gene Coexpression Analysis Identifies Genes Associated with Chlorophyll Content and Relative Water Content in Pearl Millet
Source: MDPI journal article supplement (doi:10.3390/plants12061412), 2023-03-22

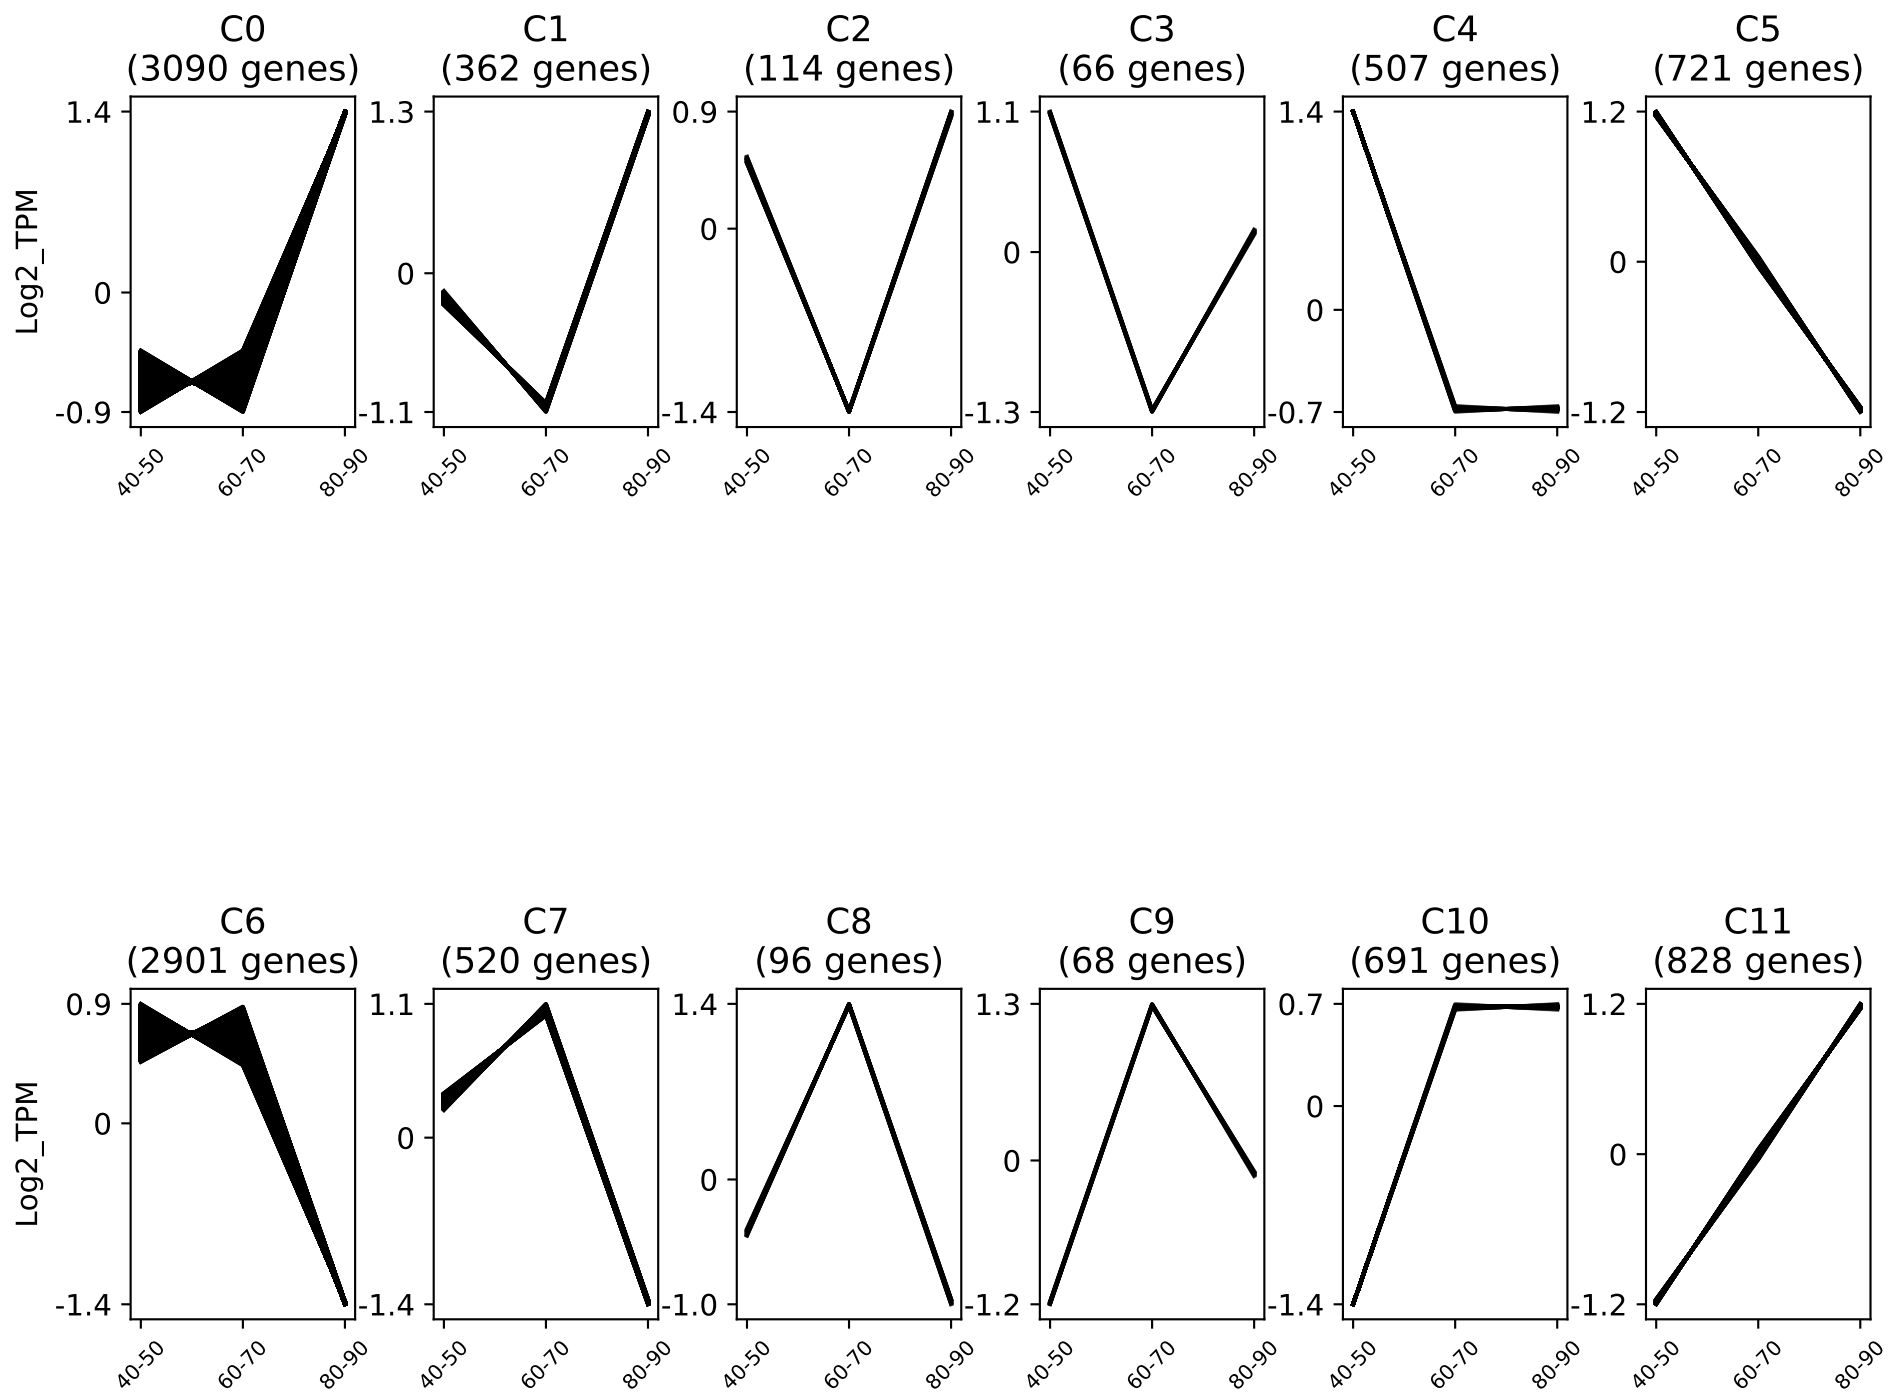

Supplement: s1 [file s1]

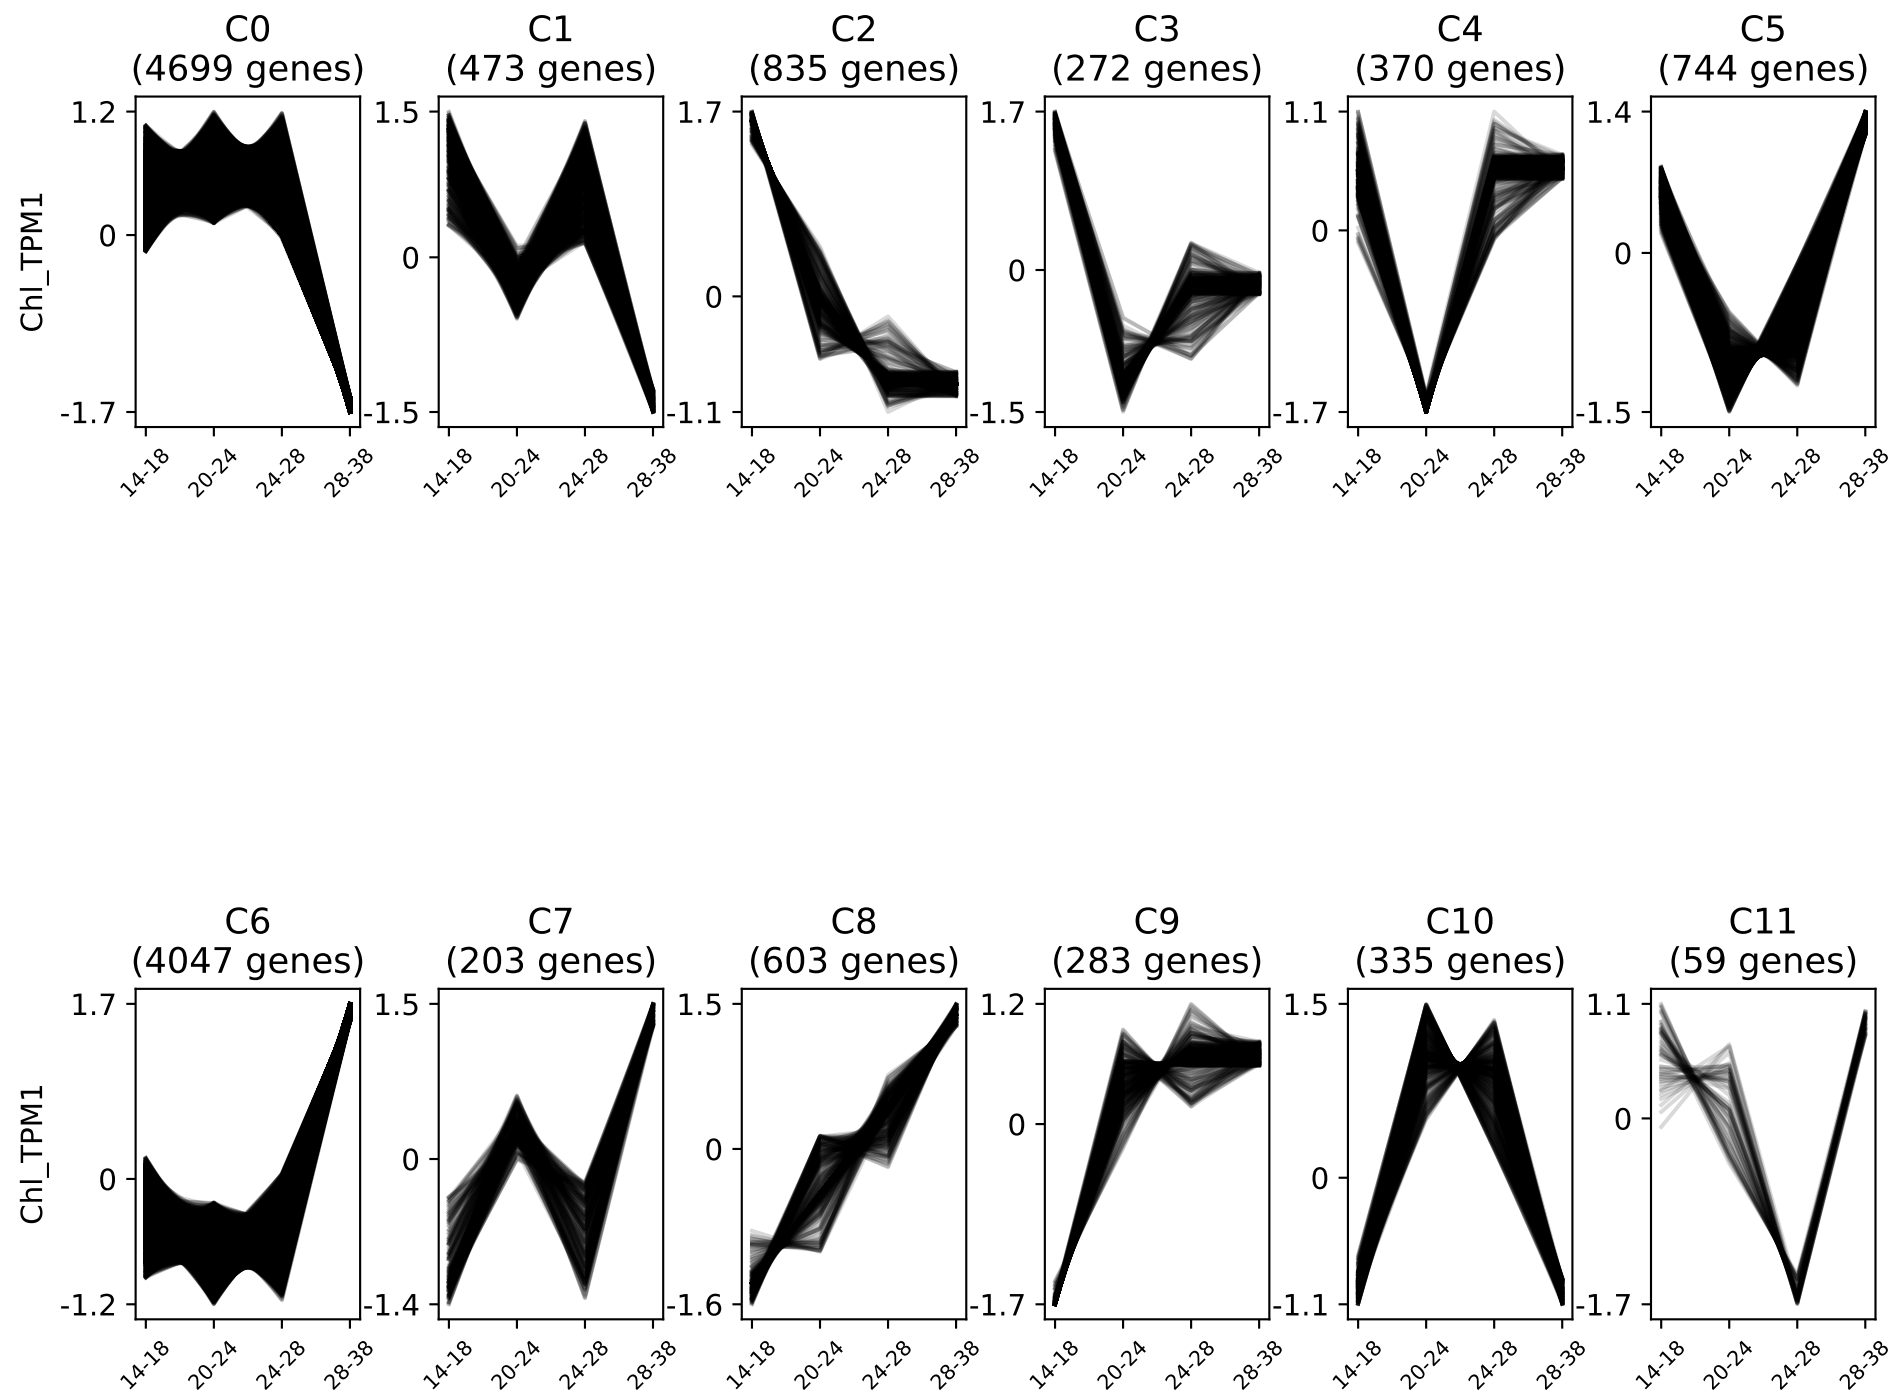

Supplement: s1 [file s1]
